# Approaches to Brain Stress Testing: BOLD Magnetic Resonance Imaging with Computer-Controlled Delivery of Carbon Dioxide

W. Alan C. Mutch<sup>1\*</sup>, Daniel M. Mandell<sup>2</sup>, Joseph A. Fisher<sup>3</sup>, David J. Mikulis<sup>2</sup>, Adrian P. Crawley<sup>2</sup>, Olivia Pucci<sup>4</sup>, James Duffin<sup>3</sup>

**1** Department of Anesthesia and Perioperative Medicine, University of Manitoba, Winnipeg, Canada, **2** Department of Medical Imaging, Neuroradiology, University of Toronto, Toronto, Canada, **3** Department of Anesthesia, University of Toronto, Toronto, Canada, **4** Thornhill Research Inc., University of Toronto, Toronto, Canada

## Abstract

**Background:** An impaired vascular response in the brain regionally may indicate reduced vascular reserve and vulnerability to ischemic injury. Changing the carbon dioxide (CO<sub>2</sub>) tension in arterial blood is commonly used as a cerebral vasoactive stimulus to assess the cerebral vascular response, changing cerebral blood flow (CBF) by up to 5–11 percent/mmHg in normal adults. Here we describe two approaches to generating the CO<sub>2</sub> challenge using a computer-controlled gas blender to administer: i) a square wave change in CO<sub>2</sub> and, ii) a ramp stimulus, consisting of a continuously graded change in CO<sub>2</sub> over a range. Responses were assessed regionally by blood oxygen level dependent (BOLD) magnetic resonance imaging (MRI).

**Methodology/Principal Findings:** We studied 8 patients with known cerebrovascular disease (carotid stenosis or occlusion) and 2 healthy subjects. The square wave stimulus was used to study the dynamics of the vascular response, while the ramp stimulus assessed the steady-state response to CO<sub>2</sub>. Cerebrovascular reactivity (CVR) maps were registered by color coding and overlaid on the anatomical scans generated with 3 Tesla MRI to assess the corresponding BOLD signal change/mmHg change in CO<sub>2</sub>, voxel-by-voxel. Using a fractal temporal approach, detrended fluctuation analysis (DFA) maps of the processed raw BOLD signal per voxel over the same CO<sub>2</sub> range were generated. Regions of BOLD signal decrease with increased CO<sub>2</sub> (coded blue) were seen in all of these high-risk patients, indicating regions of impaired CVR. All patients also demonstrated regions of altered signal structure on DFA maps (Hurst exponents less than 0.5; coded blue) indicative of anti-persistent noise. While 'blue' CVR maps remained essentially stable over the time of analysis, 'blue' DFA maps improved.

**Conclusions/Significance:** This combined dual stimulus and dual analysis approach may be complementary in identifying vulnerable brain regions and thus constitute a regional as well as global brain stress test.

**Citation:** Mutch WAC, Mandell DM, Fisher JA, Mikulis DJ, Crawley AP, et al. (2012) Approaches to Brain Stress Testing: BOLD Magnetic Resonance Imaging with Computer-Controlled Delivery of Carbon Dioxide. PLoS ONE 7(11): e47443. doi:10.1371/journal.pone.0047443

**Editor:** Thiruma V. Arumugam, University of Queensland, Australia

**Received:** June 22, 2012; **Accepted:** September 17, 2012; **Published:** November 5, 2012

**Copyright:** © 2012 Mutch et al. This is an open-access article distributed under the terms of the Creative Commons Attribution License, which permits unrestricted use, distribution, and reproduction in any medium, provided the original author and source are credited.

**Funding:** This work was funded by internal funding from Departments of Medical Imaging, the Functional Neuroimaging Laboratory, the University Health Network, Department of Anesthesiology, University Health Network and the University of Toronto, Toronto, Ontario, Canada. The funders had no role in study design, data collection and analysis, decision to publish, or preparation of the manuscript.

**Competing Interests:** The authors have read the journal's policy and have the following conflicts: Gas control used to enable this study was via a computerized gas blender (RespirAct™, Thornhill Research Inc., Toronto, Canada) custom built for the University Health Network to enable such research. TRI is a for profit spin off of the University Health Network. JAF, DJM and JD are inventors of the RespirAct™ and shareholders in TRI. Should the RespirAct™ become a commercial product, JAF, DJM and JD could gain financially. This does not alter the authors' adherence to all the PLOS ONE policies on sharing data and materials.

\* E-mail: wacmutch@shaw.ca

## Introduction

The brain is exquisitely sensitive to alterations in carbon dioxide (CO<sub>2</sub>) tension in the blood.[1] Much time and effort is spent in neuroanesthesia and neurocritical care to control arterial CO<sub>2</sub> tension because a higher CO<sub>2</sub> increases intracranial pressure and volume. Increased CO<sub>2</sub> in normal circumstances increases cerebral blood flow (CBF) by up to 5–11percent/mmHg [2] with a concomitant increase in cerebral blood volume. Alterations in this tight relationship between CO<sub>2</sub> tension and CBF occur with brain injury and disease states. Frequently cerebrovascular reactivity (CVR) to CO<sub>2</sub> is diminished or in certain circumstances actually reversed – a phenomenon termed 'cerebral steal'. [3][4]

Patients with these alterations are at far greater risk of a poor outcome following surgical intervention; for example, stroke. Thus, manipulation of CO<sub>2</sub> to prospectively assess patient risk of cerebral injury has been used for some time. These include increases in CO<sub>2</sub> by breath-holding or administration of acetazolamide to increase intracellular CO<sub>2</sub> and hydrogen ion concentration.[5] To date, blood velocity changes following CO<sub>2</sub> challenge are routinely assessed by transcranial Doppler.[6] Improving the reproducibility and precision of the CO<sub>2</sub> challenge for cerebral stress testing married to magnetic resonance imaging (MRI) for true regional assessment represents a significant step forward.[7] This objective, is in part, addressed in this study.

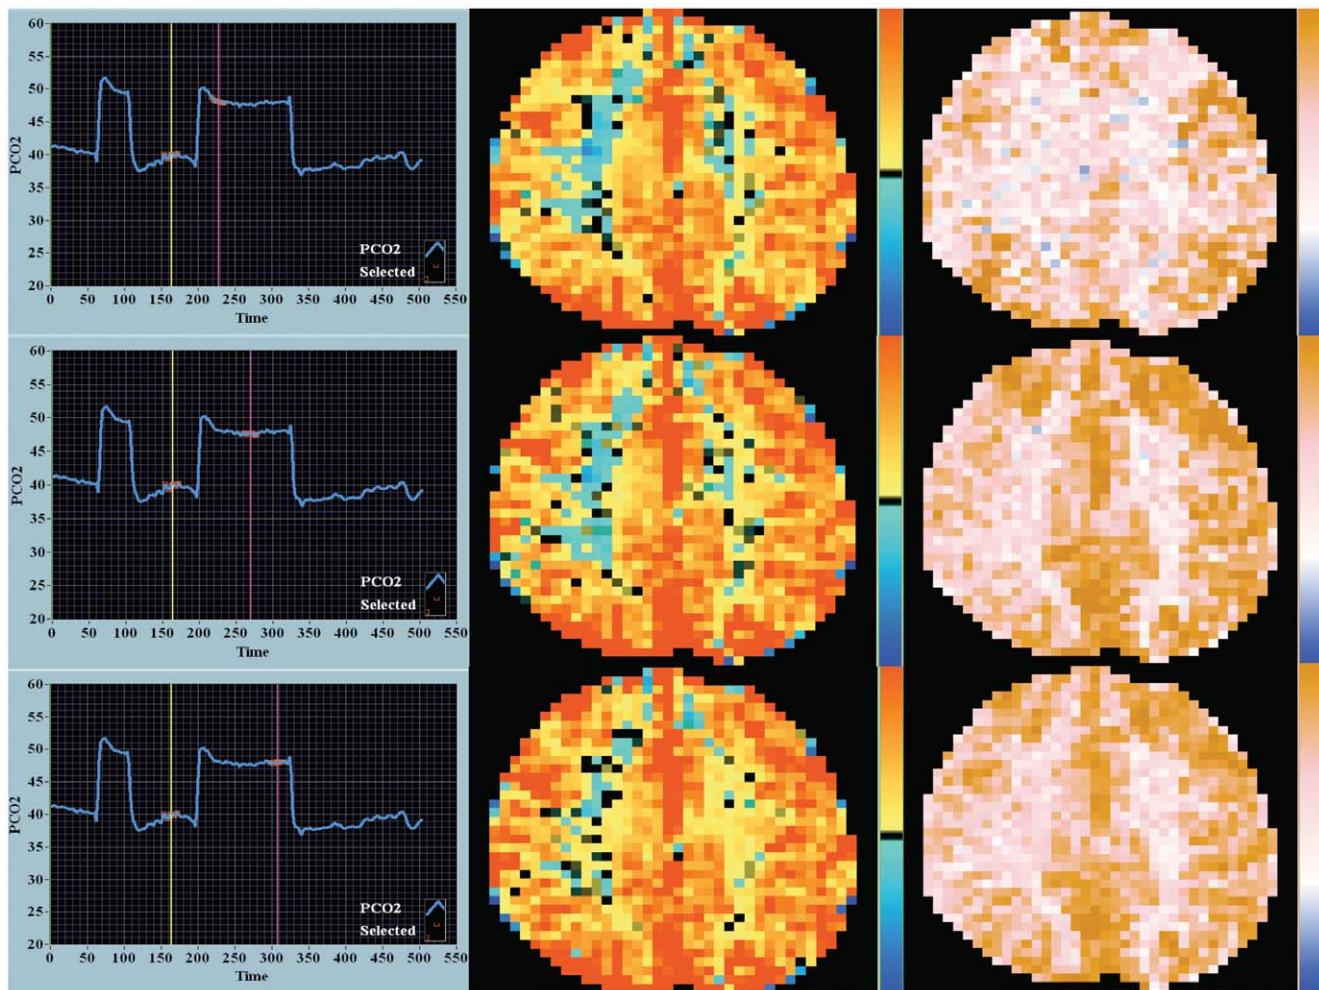

**Figure 1. Response to square wave CO<sub>2</sub> stimulus – CVR and DFA maps.** These data are from a patient who underwent the square wave sequence and ramp sequence (Figure 2) in the same sitting. Not shown in this image is the end-tidal O<sub>2</sub> tension which is stable over time at normal values (approximately 100 mmHg). The CO<sub>2</sub> stimulus is shown in the first column – start, middle and end during the two-minute stimulus. The first 45-second square wave pulse was to aid in time sequencing of the BOLD signal and CO<sub>2</sub> stimulus. Time is on the x-axis and end-tidal CO<sub>2</sub> in mmHg on the y-axis. The yellow and magenta vertical markers highlight the center of the CO<sub>2</sub> durations analyzed in the square wave sequence. The highlighted red lines are the points where the CO<sub>2</sub> tension was correlated to the MR-BOLD signal for the CVR analysis. The second column shows the corresponding CVR maps. The color key to the right of the image is upper red +0.56 arbitrary BOLD units/mmHg in CO<sub>2</sub> tension – deep blue –0.56. The third column shows the corresponding DFA maps. For the DFA maps the BOLD signal analysis was based on output as interpolated between the yellow and magenta markers. The color key to the right of the image is brown – 1.5 Hurst units, pink – 1.0 Hurst units, white – 0.5 Hurst units and deep blue – 0 Hurst units. ‘Blue’ DFA was defined as less than 0.5 Hurst units and indicates anti-persistent noise. The percentage of ‘blue’ DFA voxels noticeably decreased over time. The step change in end-tidal CO<sub>2</sub> is 8 mmHg. doi:10.1371/journal.pone.0047443.g001

Higher field strength MRI using blood oxygen level dependent (BOLD) contrast has provided improved resolution in following changes in CBF and tissue oxygenation. Resting state [8][9] and default mode [10] studies have helped define consciousness, and task-related BOLD imaging has demonstrated brain regional interconnectivity.[11][12] Here we describe dynamic brain imaging in health and disease using carefully controlled alterations in CO<sub>2</sub> to help understand CVR. We have used two patterns of changes in CO<sub>2</sub> (a stepwise change in CO<sub>2</sub> and a ramp change) and analyzed the resultant MR-BOLD output as a voxel-based ratio of change in mean BOLD signal to change in CO<sub>2</sub> to determine regional CVR [13] - and a voxel-based fractal time analysis of the MR-BOLD signal using detrended fluctuation analysis (DFA).[14] The latter technique has been successfully applied to identify activated cortical areas with functional MRI. The similarities and differences between the two carefully

controlled CO<sub>2</sub> challenges and analysis paradigms are outlined. Further understanding of these relationships should advance the concept of a ‘brain stress test’ to aid in diagnosis and treatment of brain disease.

## Methods

All patients and volunteer subjects signed written informed consent with the various protocols approved by the Ethics Review Board of the University Health Network of the University of Toronto.

## Patient Group

Eight patients with severe carotid stenosis were screened by questionnaire for demographic data and any contraindication to undergoing MRI. Patients had been referred to the CVR study



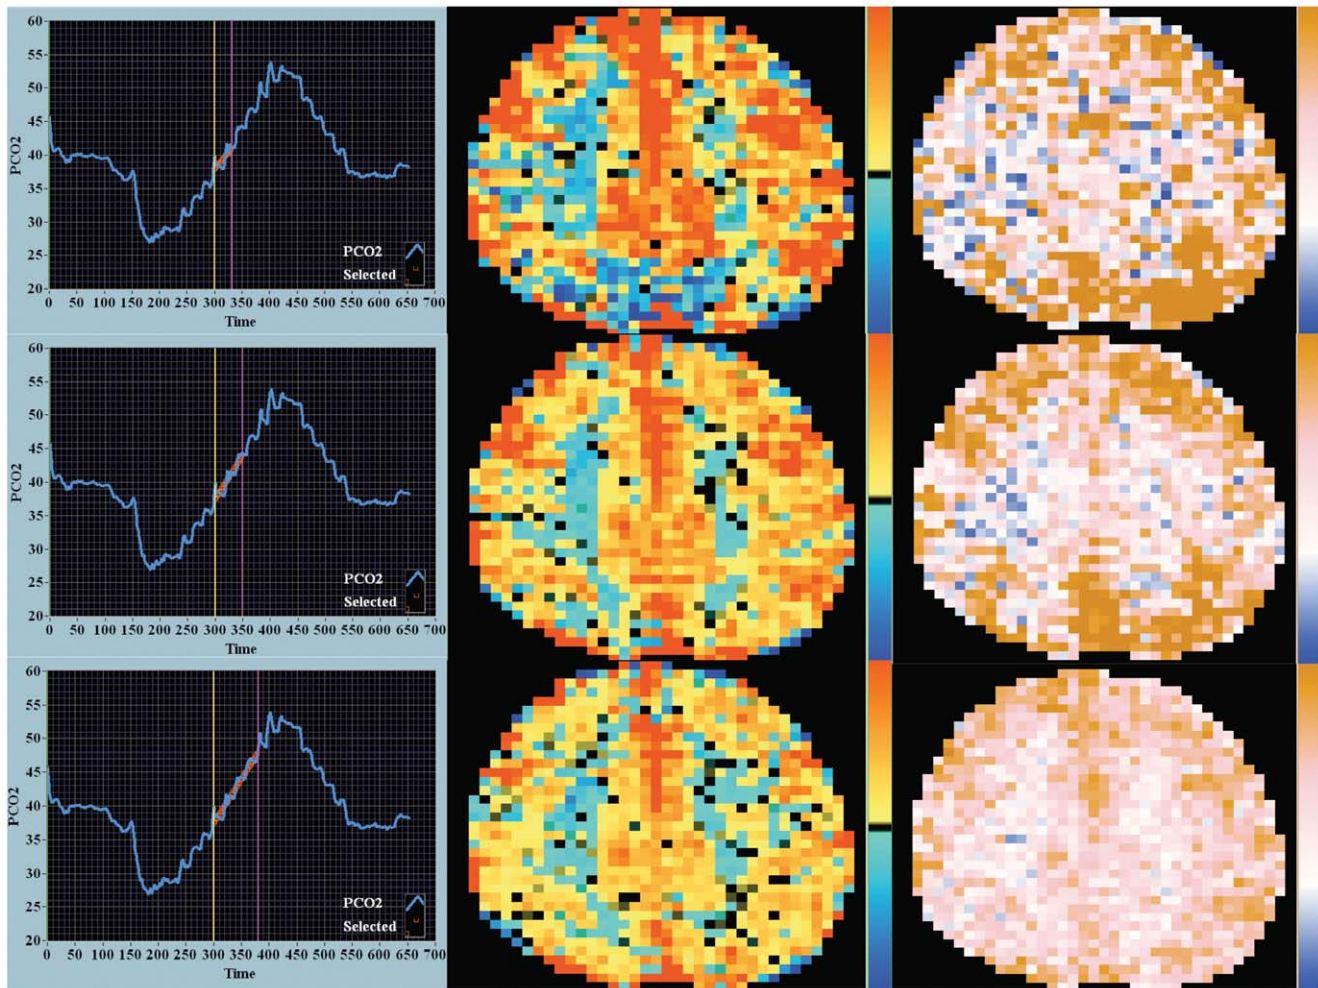

**Figure 2. Response to ramp CO<sub>2</sub> stimulus – CVR and DFA maps.** The CO<sub>2</sub> ramp stimulus is shown in the first column. The duration of the ramp stimulus increases by row. Not shown in this image is the end-tidal O<sub>2</sub> tension which is stable over time at normal values (approximately 100 mmHg). The yellow and magenta vertical markers highlight the center of the CO<sub>2</sub> durations analyzed in the square wave sequence. The highlighted red lines demonstrate the interpolated points where the CO<sub>2</sub> tension was correlated to the MR-BOLD signal for the DFA analysis. The CVR maps are shown in second column and the DFA maps in the third column. In the first time period CVR map (row 1, column 2) the deep saturation of red signal indicates initial very high responsiveness (steep slope) within these areas suggesting these voxels are on the steep linear portion of the sigmoidal CO<sub>2</sub> response curve. In the DFA map (row 1, column 3) these areas are noticeably brown with a Hurst exponent of 1.5 indicating very high time memory. The ramp change in end-tidal CO<sub>2</sub> examined is 8 mmHg. The color keys are as in Figure 1.  
doi:10.1371/journal.pone.0047443.g002

group because of significant cerebrovascular pathology. After familiarization with the protocol and fit to a breathing circuit (see below) the patients were placed in the bore of a 3.0 Tesla MR unit (Signa; GE Healthcare, Milwaukee, WI) and imaged per protocol with a BOLD echo planar sequence to assess the regional brain response to alterations in CO<sub>2</sub> (see below).

**Volunteer Subject Group** – Two healthy volunteers were studied. After familiarization with the protocol they were fit to a breathing circuit (see below). They also had simultaneous bilateral recording of middle cerebral artery blood velocity by transcranial Doppler (Spencer Technologies, Seattle, WA), and bilateral frontal cerebral oximetry (Fore-Sight, CasMed, Branford, CT), continuous finger plethysmography (Nexfin, BMEYE, Amsterdam, The Netherlands), and continuous pulse oximetry (Nellcor, Covidien, Mansfield, MA). The hemodynamic responses to the changes in CO<sub>2</sub> were recorded.

**Table 1. Patient Demographics.**

| Patient | Age | Sex | Angiographic Findings                  |
|---------|-----|-----|----------------------------------------|
| 1       | 76  | F   | Bilateral ICA stenosis                 |
| 2       | 60  | F   | Right ICA occlusion                    |
| 3       | 48  | F   | Right ICA occlusion                    |
| 4       | 35  | F   | Left ICA occlusion                     |
| 5       | 53  | M   | Left ICA stenosis                      |
| 6       | 69  | F   | Right ICA stenosis                     |
| 7       | 70  | M   | Right ICA stenosis, Left ICA occlusion |
| 8       | 70  | F   | Bilateral ICA stenosis                 |

ICA – internal carotid artery.

doi:10.1371/journal.pone.0047443.t001

## Model-based prospective end-tidal (MPET) gas breathing sequences

The theory and application of the MPET approach (RespirAct - Thornhill Research Inc. Toronto, Canada) to deliver carefully controlled gas mixtures has been described in detail previously.[15] In brief, the basic function of the sequential rebreathing circuit (fit to the study subject) is to effectively limit the inspired gas to that of the output from the gas blender, independent of actual minute ventilation. This occurs because at any minute ventilation that exceeds the flow of gas from the blender the balance of inhaled gas is provided by previously exhaled gas from a circuit reservoir. The previously exhaled gas does not contribute to gas exchange as it has already equilibrated with the arterial blood. The flows and component gas concentrations of the gas entering the breathing circuit are calculated to target specific end-tidal CO<sub>2</sub> and O<sub>2</sub> tensions using algorithms described by Slessarev et al.[15] The timing and sequence of target end-tidal CO<sub>2</sub> and O<sub>2</sub> are prospectively entered into the MPET controller, which then implements them. With this system, the exhaled CO<sub>2</sub> values have been shown to precisely reflect those in the arterial blood,[16] the

true independent variable for brain blood flow. This system is capable of generating highly reproducible square wave and ramp changes in CO<sub>2</sub> under constant O<sub>2</sub> tensions as used here (henceforth when discussing the gas mixtures programmed by the MPET we will note these as CO<sub>2</sub> or O<sub>2</sub> but imply end-tidal partial pressure of CO<sub>2</sub> or O<sub>2</sub> unless otherwise stated).

## MRI sequences

MRI was performed on a 3.0-Tesla scanner with an 8-channel phased array head coil. T1-weighted anatomic images were acquired using a 3-dimensional spoiled gradient echo pulse sequence (whole brain coverage; matrix: 256×256; slice thickness: 2.2 mm; no interslice gap). BOLD MRI data were acquired with a T2\*-weighted single-shot gradient echo pulse sequence with echo planar readout (field of view: 24×24 cm; matrix: 64×64; TR: 2000 ms; TE: 30 ms; flip angle: 85°; slice thickness: 5.0 mm; interslice gap: 2.0 mm; number of frames: 254).

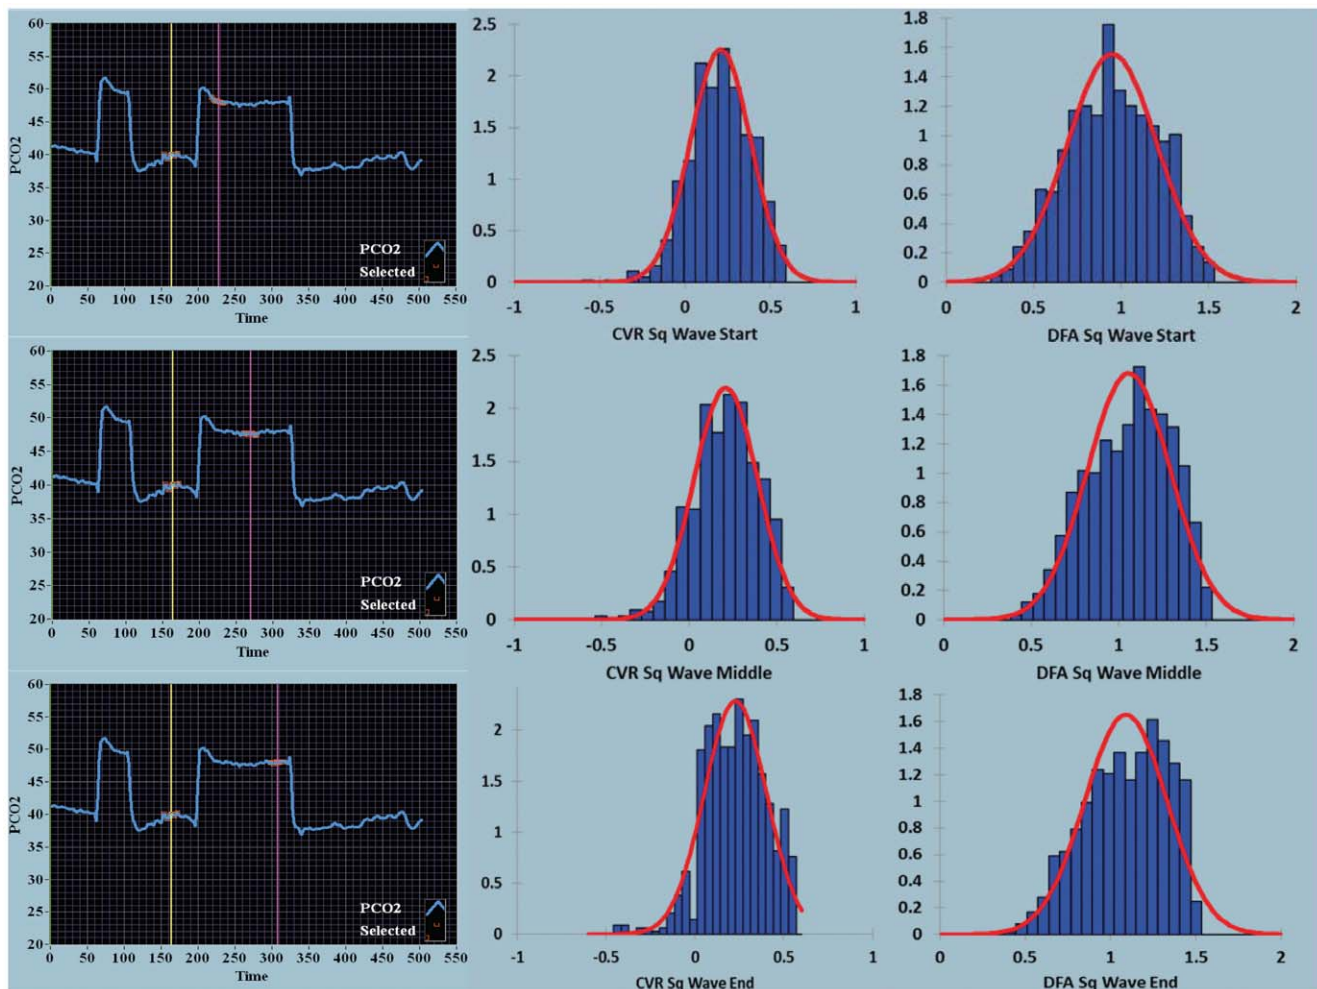

**Figure 3. Density histograms over time for the square wave stimulus for CVR and DFA maps.** The square wave sequence is shown in the first column, as defined in Figure 1. The second column shows the density histograms for the CVR output range shown on the x-axis ( $-0.56$ – $0.56$  BOLD units/mmHg CO<sub>2</sub>). The third column shows the density histograms for the DFA output range shown on the x-axis ( $0$ – $1.5$  Hurst exponent units). The red bell-shaped curves seen with the histograms are best normal curve fit to the histogram data. For the square wave sequences from start, middle and end, the mean and coefficient of variation for the CVR maps were 0.207, 0.855; 0.209, 0.871; and 0.227, 0.175 respectively, and for the DFA maps 0.947, 0.269; 1.06, 0.224; and 1.09, 0.222. doi:10.1371/journal.pone.0047443.g003



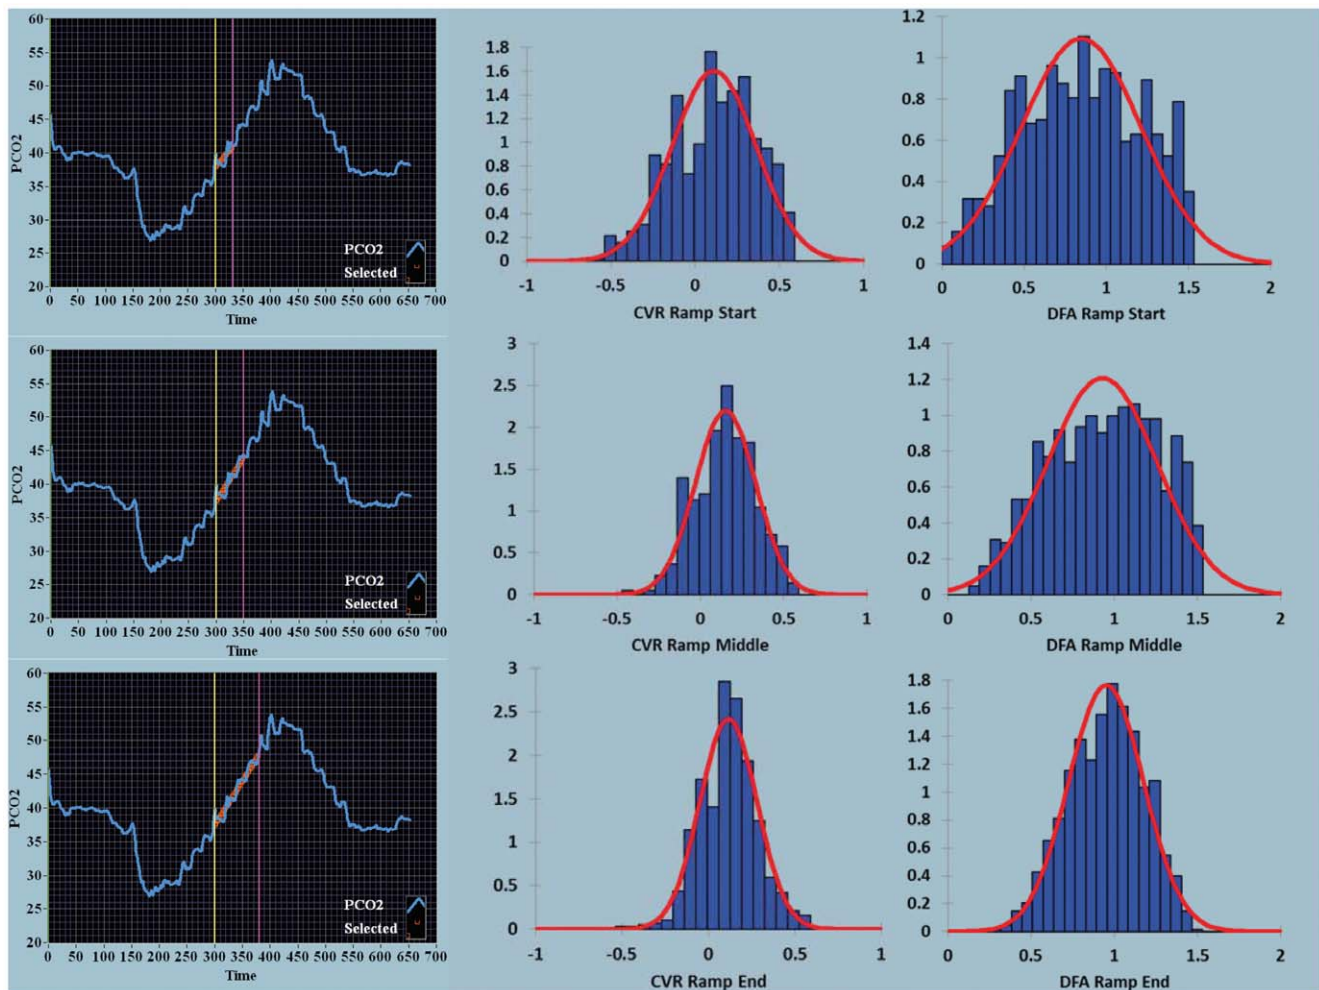

**Figure 4. Density histograms over time for the ramp stimulus for CVR and DFA maps.** For the ramp sequences from start, middle and end, the mean and coefficient of variation for the CVR maps were 0.113, 2.203; 0.151, 1.197; and 0.116, 1.422 respectively and for the DFA maps 0.847, 0.432; 0.929, 0.355; and 0.951, 0.237. Same color coding as in Figure 3. doi:10.1371/journal.pone.0047443.g004

#### Post-hoc Analysis Patient Group: CVR maps

Post-processing of the BOLD signal was per the usual techniques employing standard analysis of functional neuroimages (AFNI).[17] Custom-designed software time sequenced the  $\text{CO}_2$  alterations to the BOLD output. Here CVR is defined as the change in BOLD signal from a mean baseline measurement to a mean measurement at the altered  $\text{CO}_2$ /mean change in  $\text{CO}_2$  tension between the two measurement periods. A full description is given in reference 13. The CVR was thresholded from  $-0.56$  to  $+0.56$  arbitrary BOLD units/mmHg change in  $\text{CO}_2$ . Additionally, the raw MR output was imported into custom-written software (LabVIEW, National Instruments, Austin, TX). The CVR analysis was based on a two minute square wave alteration in  $\text{CO}_2$  tension from 40–50 mmHg. ‘Blue’ CVR maps – a decrease in BOLD signal with the  $\text{CO}_2$  stimulus (threshold 0 to  $-0.56$ ) were quantified as the percent of total voxels for the axial slice. Three time periods were chosen at the start, middle and end of the sequence. The axial slice with the greatest number of voxels was chosen for analysis in each case. In the patient undergoing both square wave and ramp  $\text{CO}_2$  protocols sequentially, the ramp data were analyzed in an incrementally increasing fashion over the same  $\text{CO}_2$  range – see Figures 1 and 2 respectively.

#### Post-hoc Analysis Patient Group: DFA maps

DFA is a temporal fractal analysis approach. The raw BOLD signal sequenced to the  $\text{CO}_2$  alterations noted above were analyzed using custom-written software (LabVIEW). The *interpolated* time periods of those used in the CVR maps were analyzed. DFA is a modified root mean square analysis of the magnitude of the noise signal fluctuations based on the granularity of the data (the time series is divided into boxes of equal length, with the longer box length customarily associated with greater signal fluctuation). A comprehensive description of the technique in relation to BOLD signal processing is given by Hu et al.[14] More generalized introductions to the technique are given by West [18] and Seely and Macklem.[19] A log-log plot of the relationship between the magnitude of fluctuation with increasing box length versus the box length is calculated. If the log-log transform of these data points have linear characteristics, the slope of this line is designated the Hurst exponent. The magnitude of the Hurst exponent is associated with well described noise patterns that have historically been identified with colors. Data were analyzed with a threshold for the Hurst exponent from 0 to 1.5. The color coding of the DFA maps were as follows – brown for a Hurst exponent in the range of 1.5 (Brownian noise), pink for a Hurst exponent of 1.0

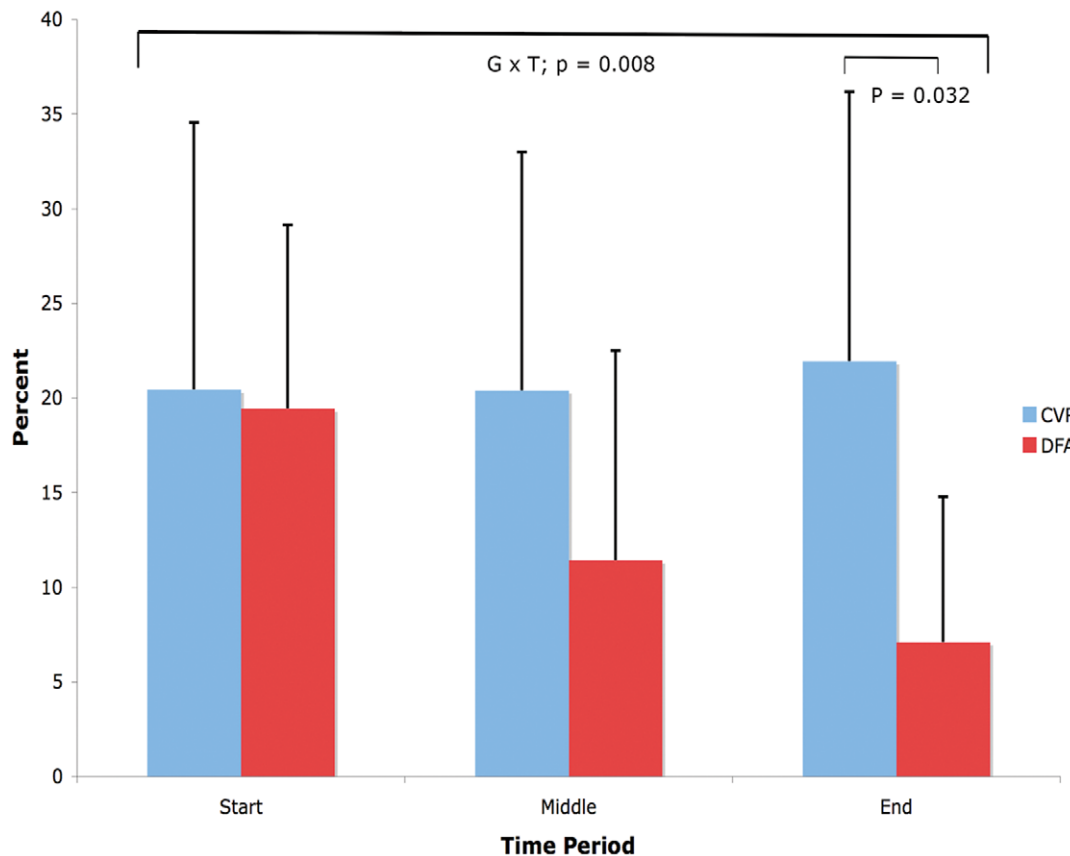

**Figure 5. Change in percentage of 'blue' voxels over time in CVR and DFA maps.** Mean percentage of 'blue' voxels for the CVR (0 to  $-0.56$  BOLD units/mmHg  $\text{CO}_2$ ) and DFA (0.5 to 0 Hurst exponent units) maps for the 8 patients with carotid steno-occlusive disease. All patients had square wave  $\text{CO}_2$  stimuli. A significant difference in mean percentage of 'blue' voxels was seen between CVR and DFA for the end time period. doi:10.1371/journal.pone.0047443.g005

(pink noise), white for a Hurst exponent of 0.5 (white noise) and blue for a Hurst exponent of 0 (anti-correlated noise). 'Blue' DFA maps – an anti-correlated time course of the BOLD signal with  $\text{CO}_2$  stimulus (threshold 0.5 to 0.0) were quantified as percent of total voxels for the axial slice. Such 'blue' maps were compared and contrasted to the 'blue' CVR maps described above.

#### Post-hoc Analysis Volunteer Subject Group

The data were recorded and stored using a custom-designed digital acquisition system (LabVIEW). Data were analyzed following download to spreadsheet and time sequenced. The various hemodynamic responses to the same ramp sequence used in the MRI studies were analyzed. Heart rate, mean arterial pressure, middle cerebral artery velocity, and frontal cerebral oximetry responses were correlated to the change in  $\text{CO}_2$  generated by the MPET gas blender.

#### Statistical Analysis

Data were analyzed using XLStat. Repeated measures ANOVA was used to compare CVR to DFA over the 3 time periods studied;  $p < 0.05$  considered significant by Tukey's test. Histogram analysis was fit to a maximal bin number of 25 for both CVR and DFA output. Correlations between hemodynamic variables versus  $\text{CO}_2$  changes were assessed by linear regression analysis;  $p < 0.05$  considered significant.

#### Results

The demographics of the 8 patients with carotid stenosis are shown in Table 1. Angiographically documented severe cerebrovascular stenosis or occlusion was seen in all patients.

A comparison of CVR maps with DFA maps over time in one patient where both the square wave and ramp sequences were performed sequentially in one sitting are shown in Figures 1 and 2. The leftmost panels in each figure show the alterations in  $\text{CO}_2$  (square wave – Figure 1 or ramp – Figure 2). The middle columns in each Figure show the CVR maps and the rightmost column the DFA maps (see the accompanying commentary with the Figures for a description of differences). Visual inspection indicates that the 'blue' voxel counts resolve more rapidly over time with DFA. Also of note is the greater percentage of 'blue' voxels with the ramp protocol, especially at the outset, but, as in the square wave  $\text{CO}_2$  challenge, resolution occurs in the later images. Also in the ramp sequence note the intense red saturation in the CVR map and the bleaching over time and the 'brown' saturation of high signal in the corresponding DFA map.

The density histograms collating the voxel-by-voxel output for each image as seen in Figures 1 and 2 are quantified in Figures 3 and 4 respectively. With both the square wave (Figure 3) and ramp (Figure 4) sequences there was a decrease in the coefficient of variation over time seen for the CVR and DFA maps. With DFA the maximal density in the histogram, in this one patient, peaked near a Hurst exponent of 1 – indicating centering at pink noise.

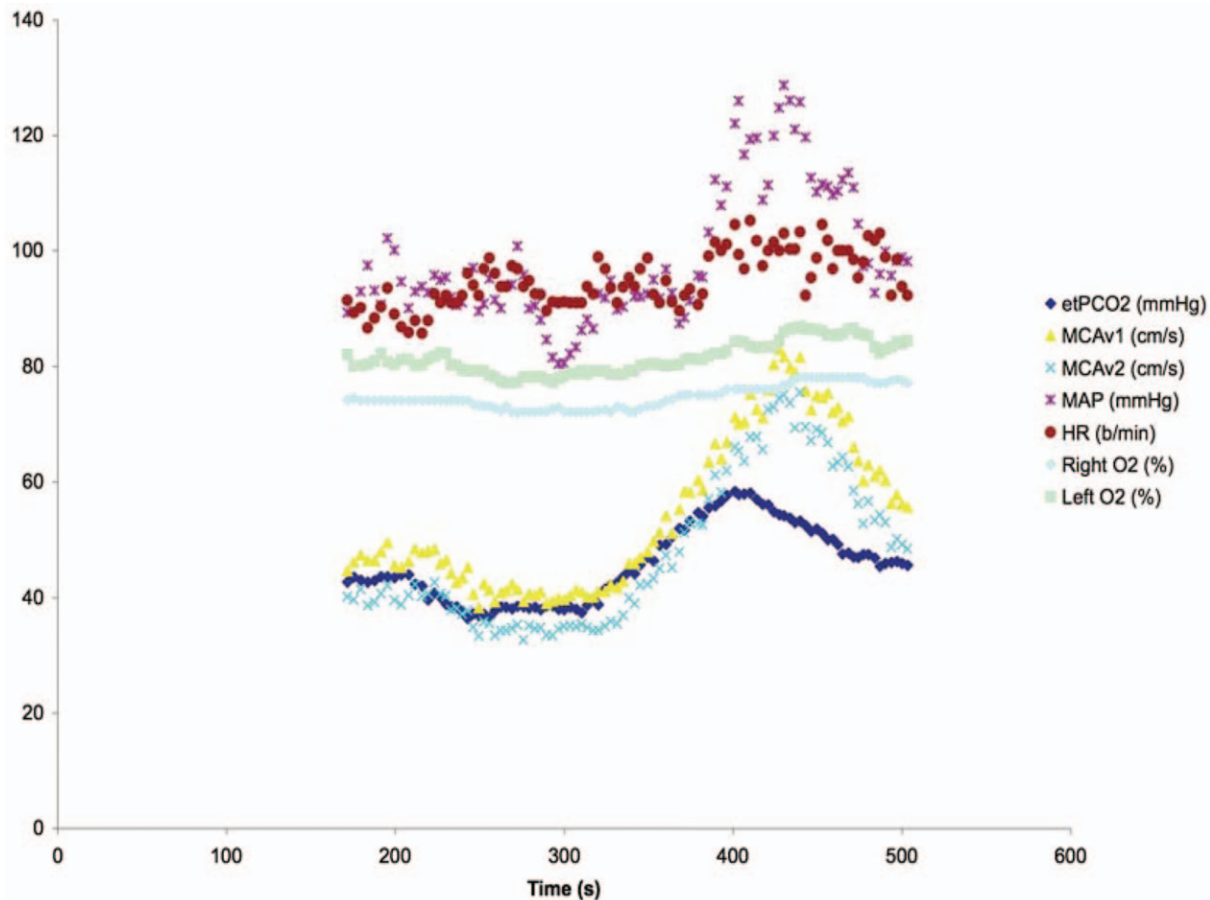

**Figure 6. Vigorous hemodynamic response to CO<sub>2</sub> ramp stimulus.** Hemodynamic response to ramp CO<sub>2</sub> stimulus in a 60 year old healthy subject. Note the marked blood pressure and cerebral blood flow velocity response to increased CO<sub>2</sub> persisting past the stimulus peak. Legend abbreviations – etPCO<sub>2</sub>; end-tidal partial pressure of carbon dioxide, MCAv; middle cerebral artery velocity, MAP; mean arterial pressure, HR; heart rate, right and left O<sub>2</sub>; cerebral O<sub>2</sub> saturation. doi:10.1371/journal.pone.0047443.g006

Figure 5 shows results from a repeated measures ANOVA for data from the 8 patients imaged with steno-occlusive disease of their carotid arteries. A significant group  $\times$  time interaction for percentage of ‘blue’ voxels over time is seen with  $p = 0.008$ . Within group comparisons reveal that the percentage of ‘blue’ voxels is significantly less with DFA compared to CVR at the end measurement period ( $p = 0.032$  by Tukey’s test).

Figure 6 shows the hemodynamic effects on a 60 year old subject undergoing the same ramp sequence as used for the patient highlighted in Figure 2. A marked hyperdynamic blood pressure and cerebral blood flow velocity response is seen with increasing CO<sub>2</sub> that persists beyond the application of the CO<sub>2</sub> stimulus. By contrast, Figure 7 shows the hemodynamic effects in a 31 year old subject with the ramp sequence; comparatively a much-dampened response is seen. Furthermore there is no increase in cerebral oxygen saturation to CO<sub>2</sub> stimulus.

#### Supporting Information – Movie S1

The accompanying movie shows the dynamic change in CVR calculated from the alteration in BOLD signal response to ramp changes in CO<sub>2</sub> tension over time.

## Discussion

This study examines dynamic BOLD imaging of the brain and response to computer-controlled, repeatable CO<sub>2</sub> stimuli. The potential to quantify the cerebrovascular responsiveness and time course in patients at serious neurological risk from ischemic events can be appreciated. The use of two approaches to initiate a controlled change in CO<sub>2</sub> (square wave and ramp stimuli) and two analysis techniques of the BOLD signal (CVR and DFA) highlight how the brain regionally responds to changes in CO<sub>2</sub> that cannot be gleaned solely by one approach or one analysis technique. Our analysis of the dynamic response to the ramp stimulus indicates both similarities and differences to that seen with the more commonly reported square wave stimulus. We note that the square wave challenge provides a window into the dynamic effect of time on the cerebral vasculature response to a constant stimulus. Whereas, by contrast, the ramp challenge highlights the effect of increasing CO<sub>2</sub> alone as time is a controlled variable as the rate of change of the increasing CO<sub>2</sub> signal is constant. The dynamics of the response to CO<sub>2</sub> can be appreciated by examination of the first measurement period in the ramp sequence (row 1 in Figure 2). The intense red signal in the CVR map (middle column) and brown signal in the DFA map (right column) suggest that these voxels are demonstrating a CO<sub>2</sub> response centered about the steep linear portion of the sigmoidal cerebrovascular response curve at a

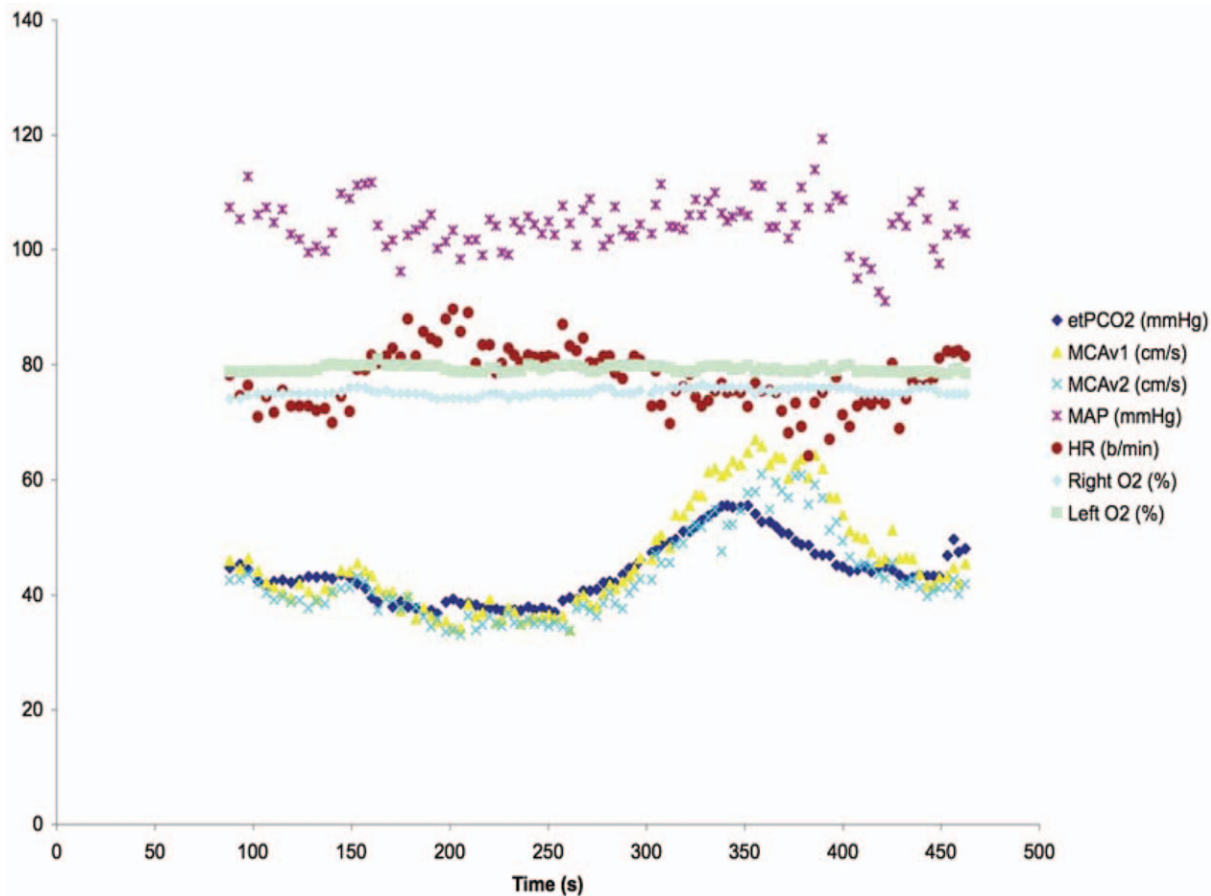

**Figure 7. Muted hemodynamic response to CO<sub>2</sub> ramp stimulus.** Hemodynamic response to ramp CO<sub>2</sub> stimulus in a 31 year old healthy subject. A much-attenuated response is seen in this individual. Same legend abbreviations as in Figure 6. doi:10.1371/journal.pone.0047443.g007

CO<sub>2</sub> of 40 mmHg. On this portion of the CO<sub>2</sub> response curve cerebral blood flow velocity can change as much as 11percent/mmHg increase in CO<sub>2</sub> tension.[2] The color fading seen in the latter two periods (rows 2 and 3) indicate a diminished responsiveness (a shallower slope) due to incorporation of BOLD signal averaging while on the plateau of the flow response to increases in CO<sub>2</sub> tension.

The generation of CVR maps using square wave CO<sub>2</sub> stimuli with these techniques have been previously reported.[20][21] Important therapeutic decisions have been based on longitudinal imaging in patients [7]; the reproducibility of the CO<sub>2</sub> stimulus allows such comparisons to be reliably made.

Detrended fluctuation analysis (DFA) is one approach to fractal signal processing.[18][22] The technique has been applied successfully to functional MRI signal analysis.[14] The application of DFA to BOLD signal analysis is predicated on the premise that the technique is able to identify whether or not the signal examined has a ‘time memory’. White noise has no memory – the signal is truly random – and has a Hurst exponent of 0.5 when the signal is processed by DFA. In contrast, many healthy physiological signals have a Hurst exponent greater than 0.5 and often close to 1.0 – pink noise. This is noise with a memory. The greater exponent indicates a repetitive pattern to the signal at every scale.[23] In the functional MRI study referenced activated voxels often demonstrated a Hurst exponent near unity. The interpretation is that the repetitive stimulus – say finger tapping – increases the BOLD signal in a reproducible manner during the course of

the stimulus. The BOLD signal which is inherently noisy now has its noise altered by the superimposed stimulus – noise now with a memory of the activation initiated by the finger tapping. Examination of our data indicates that a reproducible CO<sub>2</sub> stimulus induces a robust noise memory – so much so that the Hurst exponent approached or exceeded 1.5 – Brownian noise. In a novel manner we also examined the distribution of ‘blue’ voxels with a Hurst exponent of less than 0.5. This exponent is defined as being associated with anti-correlated or anti-persistent noise and we interpret these findings as indicating a decreasing BOLD signal with increasing CO<sub>2</sub> – akin to the negative CVR slope indicating cerebral flow redistribution or steal depicted by ‘blue’ CVR voxels.

The DFA findings suggest that this technique also provides robust maps correlated to changes in BOLD signal intensity. The intensity of this signal is likely most influenced at the venular level.[24] The oxygen saturation of venous hemoglobin, venous volume, and metabolic rate can all influence the signal intensity, and recent work indicates that altered diffusion can also influence BOLD signal strength.[25] DFA demonstrates a dynamic response as opposed to CVR, which is a more static ratio of net signal change to the change in CO<sub>2</sub>. DFA is calculated from raw signal over time, while the signal for CVR is a mean value over time at different CO<sub>2</sub> levels. As such, the changes in BOLD signal as measured by DFA may be tracking dynamic changes in oxygen extraction fraction from the blood. Consistent with this hypothesis is the finding of an increase in signal memory (increasing Hurst exponent) with activated voxels in functional MRI studies as a



surrogate for increased venous oxygenation (and reduced oxygen extraction fraction). In an analogous fashion, the increase in anti-correlated DFA signal (decreasing Hurst exponent) seen in the 'blue' voxels should map decreased venous oxygenation or an increased oxygen extraction fraction. Follow-up studies relating 'blue' DFA maps to quantitative BOLD imaging or PET imaging with  $^{15}\text{O}$  may permit more definitive interpretation.[26]

Attenuation of the 'blue' DFA signal over time in both the square wave and ramp  $\text{CO}_2$  sequences requires comment. A partial explanation may be surmised from the two studies done in the subjects with measures of cerebral oxygen saturation using near infrared spectroscopy and middle cerebral blood flow velocity with transcranial Doppler (Figures 6 and 7). In both these studies, cerebral blood flow velocity (as a surrogate for cerebral blood flow) showed a progressive increase in flow velocity that outlasted the maximal  $\text{CO}_2$  response of the ramp sequence. In the first subject (Figure 6) there was also a vigorous increase in blood pressure to the  $\text{CO}_2$  stimulus. In the presence of increased  $\text{CO}_2$  the cerebral circulation becomes pressure passive and cerebral blood flow would passively increase with increased driving pressure. The dynamic responsiveness, with resolution of 'blue' DFA voxels over time may be, in part, contingent on the systemic pressure mediated changes in response to  $\text{CO}_2$ . Thus, to the extent that risk is related to either the regional changes in blood flow or its time course, the interplay between CVR and DFA responsiveness provides two windows from which to view individual patient neurological risk in the presence of steno-occlusive disease of the cerebral vasculature.

With DFA the histogram density peaked at a Hurst exponent near 1.0 with a decrease in the coefficient of variation. Healthy physiologic signals often are seen with a Hurst exponent approaching unity. Highlighting the one patient with both a square wave and ramp sequence suggests an adaptive response is seen to the perturbation of  $\text{CO}_2$  stimulus. One interpretation from this patient is that these results support the concept of allometric

control in response to a stimulus – measuring the fractal time signature of the signal response and its change over time.[23] West and colleagues have also advanced the notion of maximal information transfer in fractal physiological systems when signal noise is tuned to a fractal exponent of unity.[27][28]

In summary, we present two protocols to induce a  $\text{CO}_2$  stimulus and two analysis techniques to process the resultant MR-BOLD signal. Such an approach demonstrates the potential utility of an enhanced brain stress test in the evaluation of patients with cerebrovascular steno-occlusive disease. Further studies based on these findings may delineate which patients are at greatest risk of stroke or post-operative delirium – to name but two examples – following surgical procedures.

## Supporting Information

**Movie S1 Changes in CVR over time with the ramp stimulus in a patient with 'blue' brain.** This video shows the alterations in CVR slope with ramp alterations in end-tidal  $\text{CO}_2$  tensions. The dynamic behavior is in evidence here over the course of the provocative stimulus.

(MP4)

## Acknowledgements

WACM thanks all the other authors for their mentoring while he has learned CVR techniques while on sabbatical at the University of Toronto.

## Author Contributions

Conceived and designed the experiments: WACM DMM JAF JD. Performed the experiments: DJM APC OP. Analyzed the data: WACM DMM APC OP JD. Contributed reagents/materials/analysis tools: OP JD. Wrote the paper: WACM DMM JAF DJM APC JD.

## References

- Goode SD, Krishan S, Alexakis C, Mahajan R, Auer DP (2009) Precision of cerebrovascular reactivity assessment with use of different quantification methods for hypercapnia functional MR imaging. *Am J Neuroradiol* 30: 972–977.
- Battisti-Charbonney A, Fisher JA, Duffin J (2011) Cerebrovascular and cardiovascular responses to isocapnic hypoxia. *Resp Physiol Neurobiol* 179: 259–268. Available: <http://dx.doi.org/10.1016/j.resp.2011.09.004>.
- Yonas H, Pindzola RR (1994) Physiological determination of cerebrovascular reserves and its use in clinical management. *Cerebrovasc Brain Metab Rev* 6: 325–340.
- Pindzola RR, Sashin D, Nemoto EM, Kuwabara H, Wilson JW, et al. (2006) Identifying regions of compromised hemodynamics in symptomatic carotid occlusion by cerebrovascular reactivity and oxygen extraction fraction. *Neurol Res* 28: 149–154.
- Nemoto EM, Yonas H, Kuwabara H, Pindzola R, Sashin D, et al. (2005) Differentiating hemodynamic compromise by the OEF response to acetazolamide in occlusive vascular disease. *Adv Exp Med Biol* 566:135–41: 135–141.
- Pindzola RR, Balzer JR, Nemoto EM, Goldstein S, Yonas H (2001) Cerebrovascular reserve in patients with carotid occlusive disease assessed by stable xenon-enhanced CT cerebral blood flow and transcranial Doppler. *Stroke* 32: 1811–1817.
- Han JS, Abou-Hamden A, Mandell DM, Poublanc J, Crawley AP, et al. (2011) Impact of extracranial-intracranial bypass on cerebrovascular reactivity and clinical outcome in patients with symptomatic moyamoya vasculopathy. *Stroke* 42: 3047–3054. Available: <http://www.ncbi.nlm.nih.gov/pubmed/21903951>.
- Ramot M, Wilf M, Goldberg H, Weiss T, Deouell LY, et al. (2011) Coupling between spontaneous (resting state) fMRI fluctuations and human oculo-motor activity. *Neuro Image* 58: 213–225. Available: <http://linkinghub.elsevier.com/retrieve/pii/S1053811911006239>.
- Kiviniemi V, Remes J, Starck T, Nikkinen J, Haapea M, et al. (2009) Mapping transient hyperventilation induced alterations with estimates of the multi-scale dynamics of BOLD signal. *Frontiers Neuroinformatics* 3: 18. Available: <http://www.pubmedcentral.nih.gov/articlerender.fcgi?artid=2715265&tool=pmcentrez&rendertype=abstract>.
- Werner G (2009) Viewing brain processes as critical state transitions across levels of organization: Neural events in cognition and consciousness, and general principles. *Bio Systems* 96: 114–119. Available: <http://www.ncbi.nlm.nih.gov/pubmed/19124060>.
- Stamatakis EA, Adapa RM, Absalom AR, Menon DK (2010) Changes in resting neural connectivity during propofol sedation. *PLoS ONE* 5: e14224. Available: <http://www.pubmedcentral.nih.gov/articlerender.fcgi?artid=2996305&tool=pmcentrez&rendertype=abstract>.
- Kasahara M, Menon DK, Salmond CH, Outtrim JG, Tavares JVT, et al. (2011) Traumatic brain injury alters the functional brain network mediating working memory. *Brain Injury* 25: 1170–1187. Available: <http://www.ncbi.nlm.nih.gov/pubmed/21932994>. Accessed
- Mandell DM, Han JS, Poublanc J, Crawley AP, Stainsby JA, et al. (2008) Mapping cerebrovascular reactivity using blood oxygen level-dependent MRI in patients with arterial steno-occlusive disease: comparison with arterial spin labeling MRI. *Stroke* 39: 2021–2028.
- Hu J, Lee JM, Gao J, White KD, Crosson B (2008) Assessing a signal model and identifying brain activity from fMRI data by a detrending-based fractal analysis. *Brain Struct Funct* 212: 417–426.
- Slessarev M, Han J, Mardimac A, Prisman E, Preiss D, et al. (2007) Prospective targeting and control of end-tidal  $\text{CO}_2$  and  $\text{O}_2$  concentrations. *J Physiol* 581: 1207–1219.
- Fierstra J, Conklin J, Krings T, Slessarev M, Han JS, et al. (2011) Impaired perinatal cerebrovascular reserve in seizure patients with brain arteriovenous malformations. *Brain* 134: 100–109.
- Cox RW (1996) AFNI: software for analysis and visualization of functional magnetic resonance neuroimages. *Computers Biomed Res* 29: 162–173. Available: <http://www.ncbi.nlm.nih.gov/pubmed/8812068>.
- West BJ (2010) Fractal physiology and the fractional calculus: a perspective. *Frontiers Physiol* 1:12. Available: <http://www.pubmedcentral.nih.gov/articlerender.fcgi?artid=3059975&tool=pmcentrez&rendertype=abstract>.
- Seely AJ, Macklem PT (2004) Complex systems and the technology of variability analysis. *Crit Care* 8: R367–R384.
- Heyn C, Poublanc J, Crawley A, Mandell D, Han JS, et al. (2010) Quantification of cerebrovascular reactivity by blood oxygen level-dependent MR imaging and correlation with conventional angiography in patients with Moyamoya disease. *Am J Neuroradiol* 31: 862–867.

21. Kassner A, Winter JD, Poulanc J, Mikulis DJ, Crawley AP (2010) Blood-oxygen level dependent MRI measures of cerebrovascular reactivity using a controlled respiratory challenge: reproducibility and gender differences. *J Magn Reson Imaging* 31: 298–304.
22. Goldberger AL, West BJ (1987) Fractals in physiology and medicine. *Yale J Biol Med* 60: 421–435.
23. West BJ (2009) Control from an allometric perspective. *Adv Exp Med Biol* 629:57–82: 57–82.
24. Tak S, Jang J, Lee K, Ye JC (2010) Quantification of CMRO<sub>2</sub> without hypercapnia using simultaneous near-infrared spectroscopy and fMRI measurements. *Phys Med Biol* 55: 3249–3269. Available: <http://www.ncbi.nlm.nih.gov/pubmed/20479515>.
25. Dickson JD, Ash TWJ, Williams GB, Harding SG, Carpenter TA, et al. (2010) Quantitative BOLD: the effect of diffusion. *J Mag Res Imaging* 32: 953–961. Available: <http://www.ncbi.nlm.nih.gov/pubmed/20882626>.
26. Powers WJ, Zazulia AR (2003) The use of positron emission tomography in cerebrovascular disease. *Neuroimaging Clinics of North America* 13: 741–758. Available: <http://linkinghub.elsevier.com/retrieve/pii/S1052514903000911>.
27. West BJ, Grigolini P (2010) The living matter way to exchange information. *Med Hypotheses* 75: 475–478.
28. Aquino G, Bologna M, West BJ, Grigolini P (2011) Transmission of information between complex systems: 1/f resonance. *Phys Rev E Stat Nonlin Soft Matter Phys* 83: 51130.
